# Supplementary material for: Unusual tellurium(iv) mediated cyclisation diols into dihydroxazoles with potential anticancer activity
Source: Royal Society of Chemistry journal article supplement (doi:10.1039/d3nj03186a), 2023-01-01
Supplement: d3nj03186a1.pdf [file d3nj03186a1.pdf]

## Supporting Information

### Unusual Tellurium(IV) mediated cyclisation of diols into dihydroxazoles with potential anticancer activity

Kenneth D'Arcy, Tim Schäfer, Michele De Franco, Raffaele Ricco',\* Valentina Gandin, Pablo J. Sanz Miguel, Diego Montagner\*

#### Content

**Figure S1:**  $^1\text{H}$ ,  $^{13}\text{C}$ , and  $^{125}\text{Te}$  NMR spectra of compound **1**

**Figure S2:** FTIR and ESI-MS of compound **1**

**Figure S3:**  $^1\text{H}$ ,  $^{13}\text{C}$ , and  $^{125}\text{Te}$  NMR spectra of compound **2**

**Figure S4:** FTIR and ESI-MS of compound **2**

**Figure S5:**  $^1\text{H}$  and  $^{13}\text{C}$  NMR spectra of compound **3**

**Figure S6:**  $^{125}\text{Te}$  and  $^{19}\text{F}$  NMR spectra of compound **3**

**Figure S7:** FTIR and ESI-MS of compound **3**

**Figure S8:**  $^1\text{H}$  and  $^{13}\text{C}$  NMR spectra from the decomposition of compound **1** after 3 days in water at room temperature

**Figure S9:**  $^1\text{H}$  and  $^{13}\text{C}$  NMR spectra from the decomposition of compound **2** after 3 days in water at room temperature

**Figure S10:**  $^1\text{H}$  and  $^{13}\text{C}$  NMR spectra from the decomposition of compound **3** after 3 days in water at room temperature

**Figure S11:** ESI-MS spectra of compounds **2** and **3** after decomposition

**Figure S12:** ESI-MS decomposition pattern of compounds **1-3**

**Tables S1-S2:** Selected distances and angles in the crystal structures of **1-3**

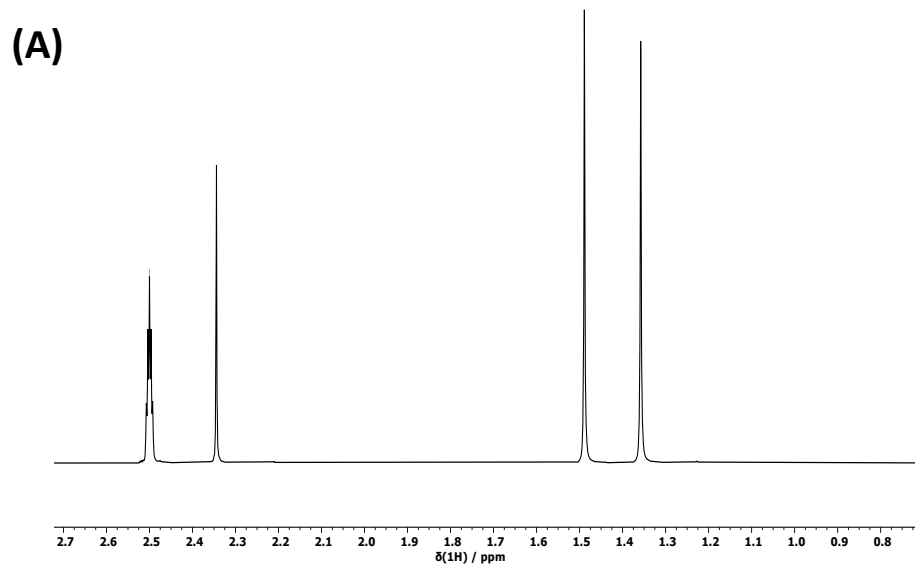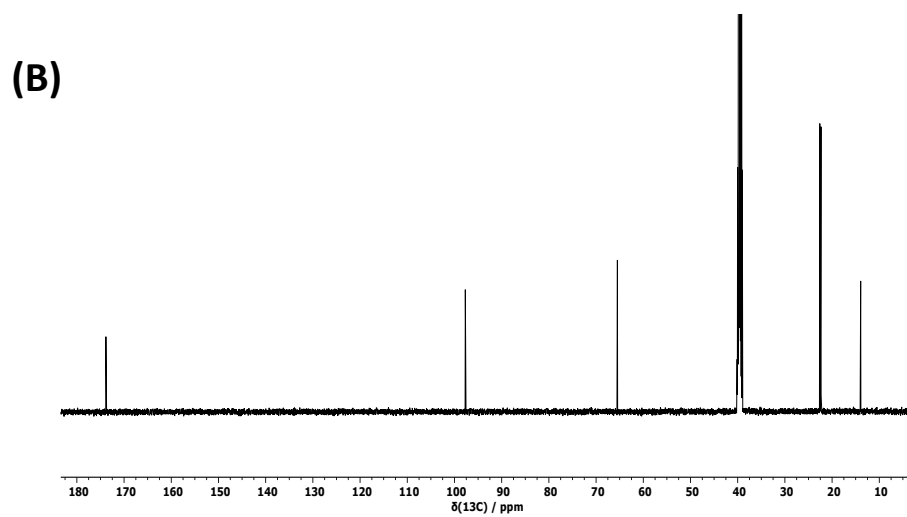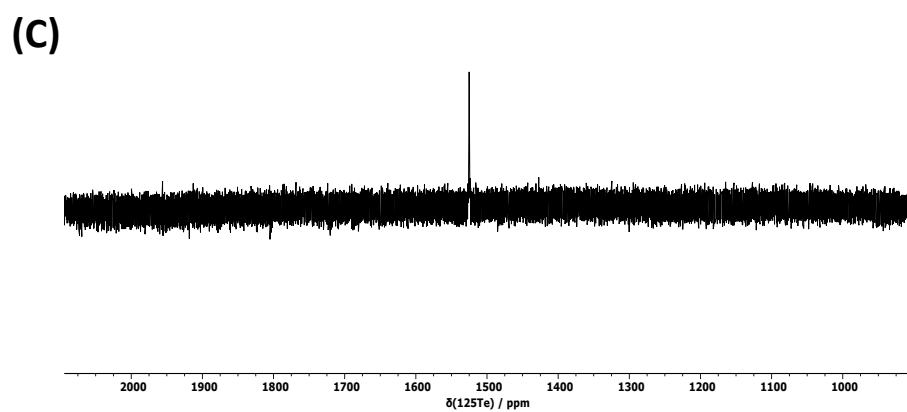

Figure S1. NMR Spectra of A)  $^1\text{H}$ , B)  $^{13}\text{C}$ , and C)  $^{125}\text{Te}$  NMR of compound **1** in  $\text{DMSO-}d_6$

(A)

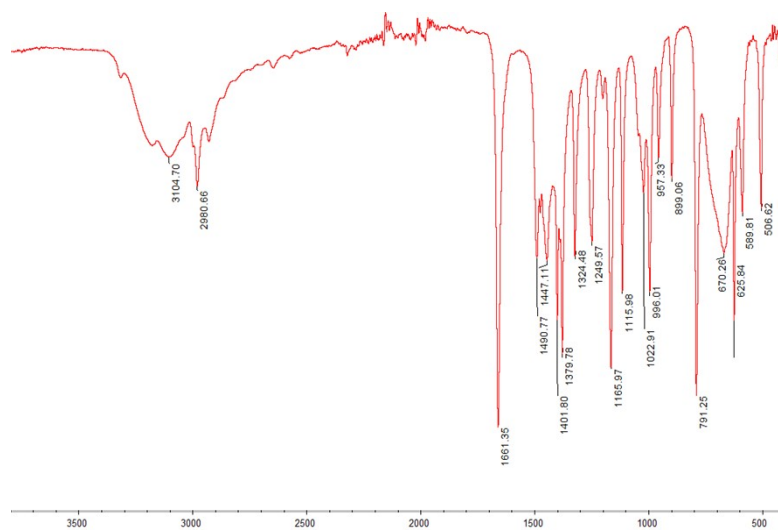

(B)

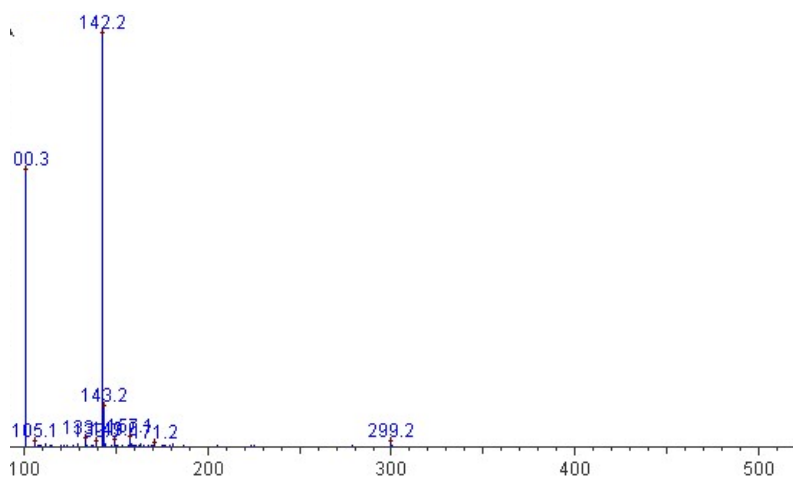

**Figure S2.** A) FTIR spectrum of compound **1**. Assignments ( $\text{cm}^{-1}$ ): 2980  $\rightarrow$  str. C-H ( $\text{CH}_3$ ); 1661  $\rightarrow$  str. C=N (ring); 1441  $\rightarrow$  oxazole ring vibr.; 1380  $\rightarrow$  sym. bend.  $\text{CH}_3\text{-C-CH}_3$ ; 1165  $\rightarrow$  str. C- $\text{CH}_3$ ; 1116  $\rightarrow$  str. -C-O-; 1023  $\rightarrow$  sym str. =C-O-; 996  $\rightarrow$  C-H oop vibr. ( $\text{CH}_3$ ); 791  $\rightarrow$  rocking  $\text{CH}_3\text{-C-CH}_3$ ; 670  $\rightarrow$  wagging  $\text{CH}_3\text{-C-C-CH}_3$ ; 590  $\rightarrow$  C-C skeleton vib.; 506  $\rightarrow$  C-C skeleton vib. B) ESI-MS (+) Mass spectrum of compound **1** (base peak:  $m/z$  142)

(A)

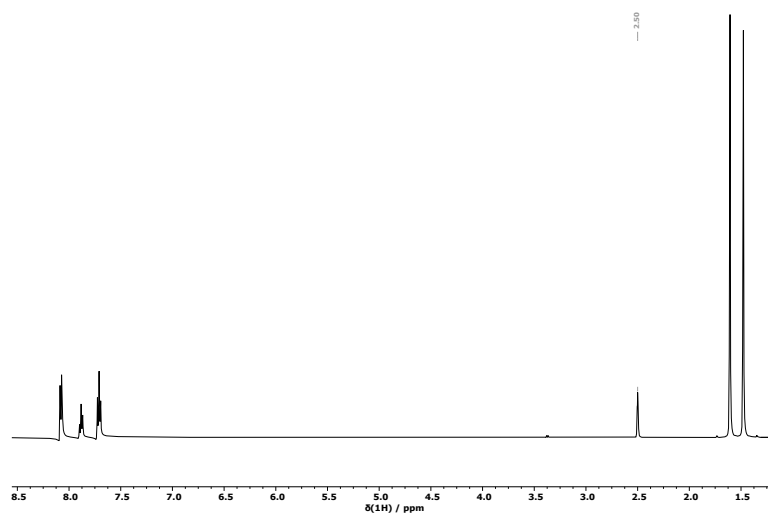

(B)

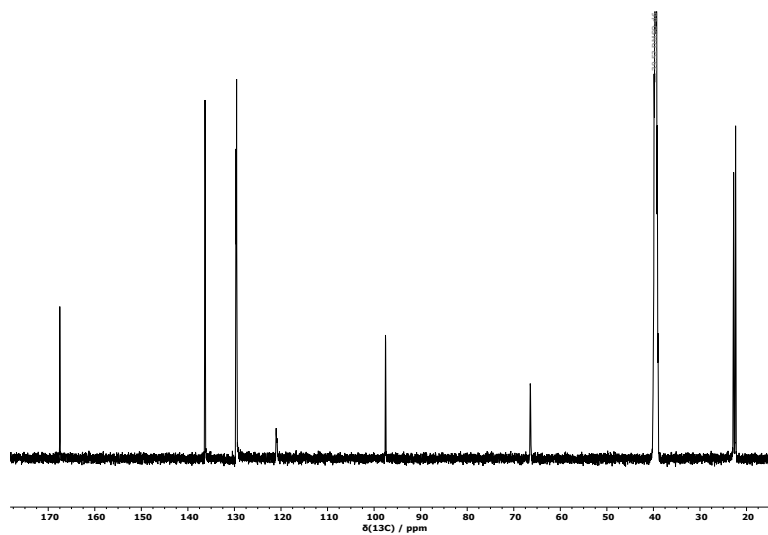

(C)

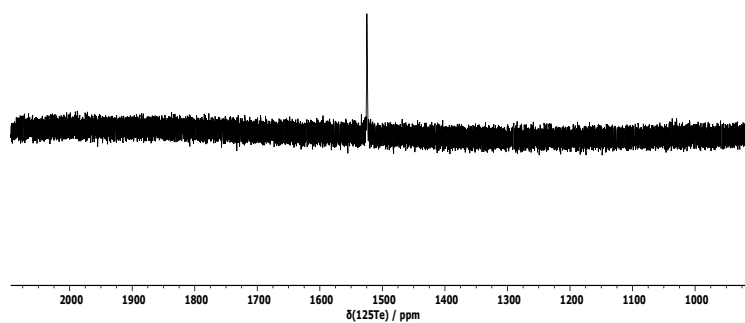

Figure S3. NMR Spectra of A)  $^1\text{H}$ , B)  $^{13}\text{C}$ , and C)  $^{125}\text{Te}$  NMR of compound **2** in  $\text{DMSO-}d_6$

(A)

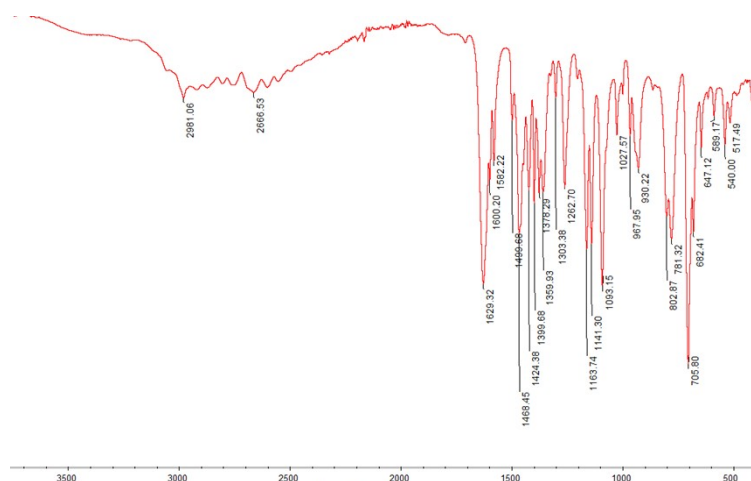

(B)

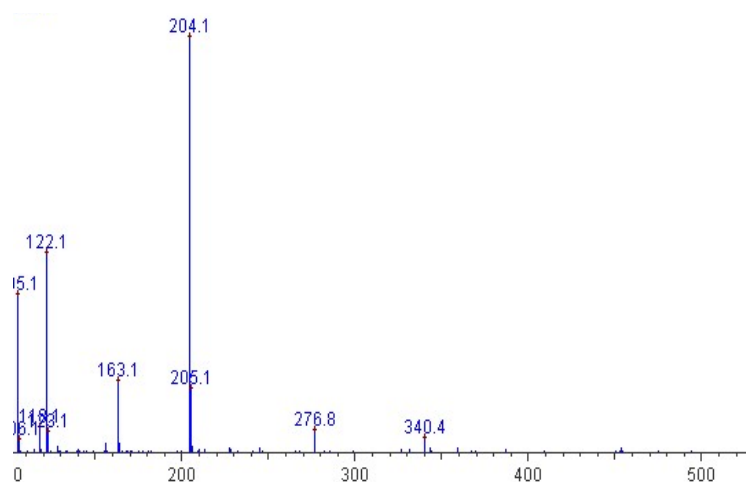

**Figure S4.** A) FTIR spectrum of compound **2**. Assignments ( $\text{cm}^{-1}$ ): 2981  $\rightarrow$  str. C-H ( $\text{CH}_3$ ); 1629  $\rightarrow$  str. C=N (ring); 1468  $\rightarrow$  oxazole ring vibr.; 1379  $\rightarrow$  sym. bend.  $\text{CH}_3\text{-C-CH}_3$ ; 1262  $\rightarrow$  Ph-C(=N)(-O) vib.; 1163  $\rightarrow$  str. C- $\text{CH}_3$ ; 1141  $\rightarrow$  str. -C-O-; 1093  $\rightarrow$  ip vibration C-H from benzene; 1027  $\rightarrow$  sym str. =C-O-; 930  $\rightarrow$  C-H oop vibr. ( $\text{CH}_3$ ); 780  $\rightarrow$  rocking  $\text{CH}_3\text{-C-CH}_3$ ; 705  $\rightarrow$  oop vibration benzene ring; 682  $\rightarrow$  wagging  $\text{CH}_3\text{-C-C-CH}_3$ ; 589  $\rightarrow$  C-C skeleton vib.; 540  $\rightarrow$  ip vibration benzene ring; 517  $\rightarrow$  C-C skeleton vib.; B) ESI-MS (+) Mass spectrum of compound **2** (base peak:  $m/z$  204)

(A)

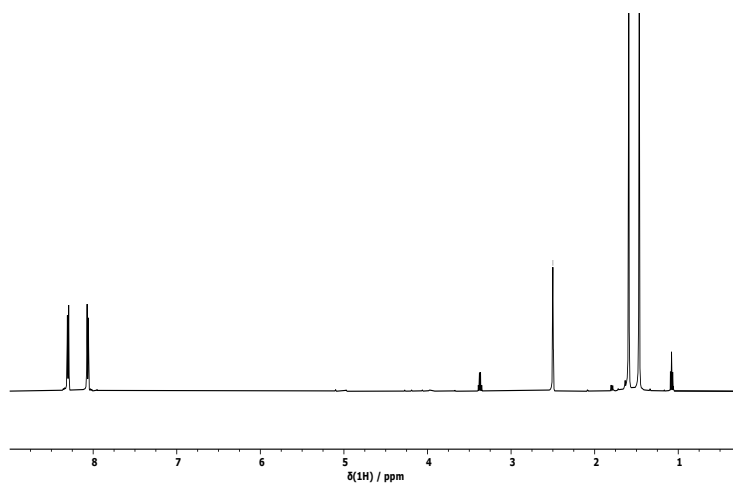

(B)

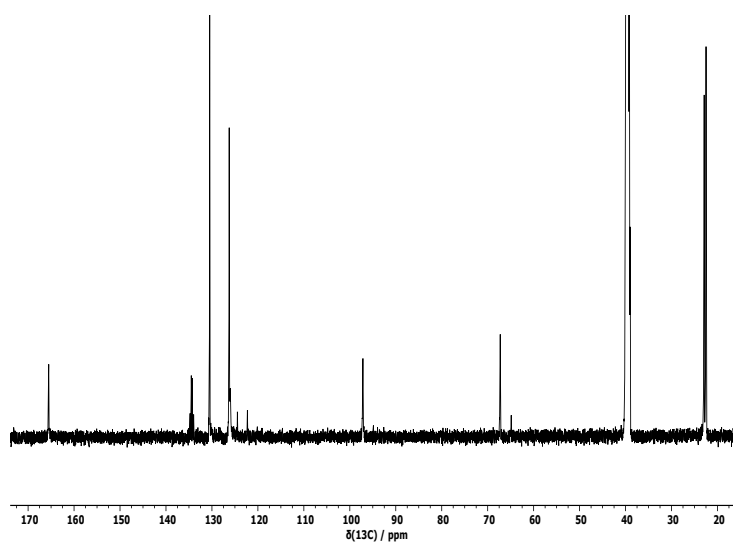

Figure S5. NMR Spectra of A)  $^1\text{H}$ , and B)  $^{13}\text{C}$  NMR of compound **3** in  $\text{DMSO-}d_6$

(A)

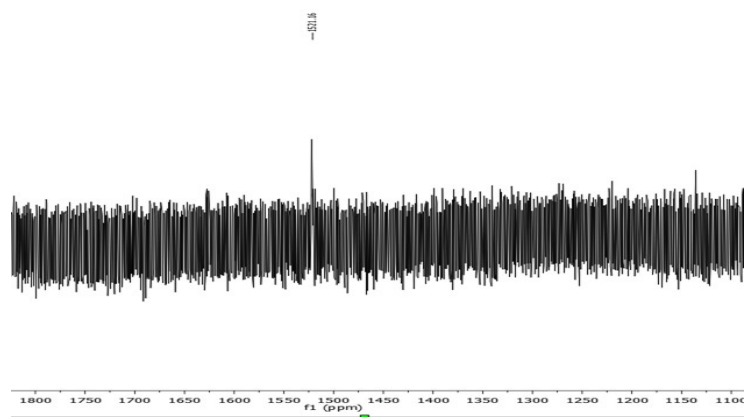

(B)

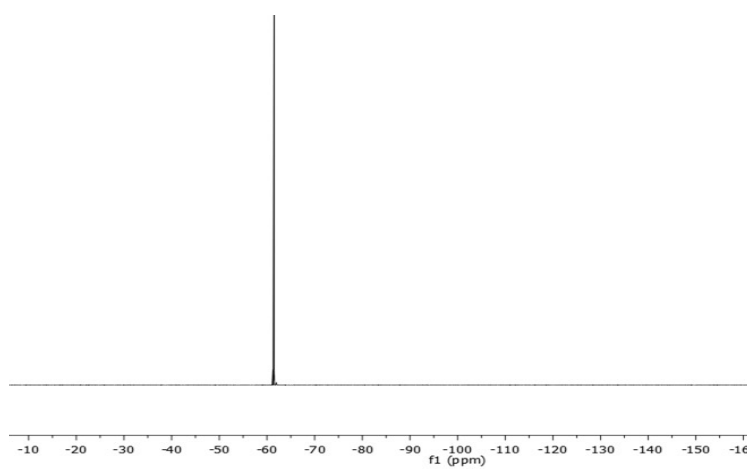

Figure S6. NMR Spectra of A)  $^{125}\text{Te}$ , and B)  $^{19}\text{F}$  NMR of compound **3** in  $\text{DMSO-}d_6$

(A)

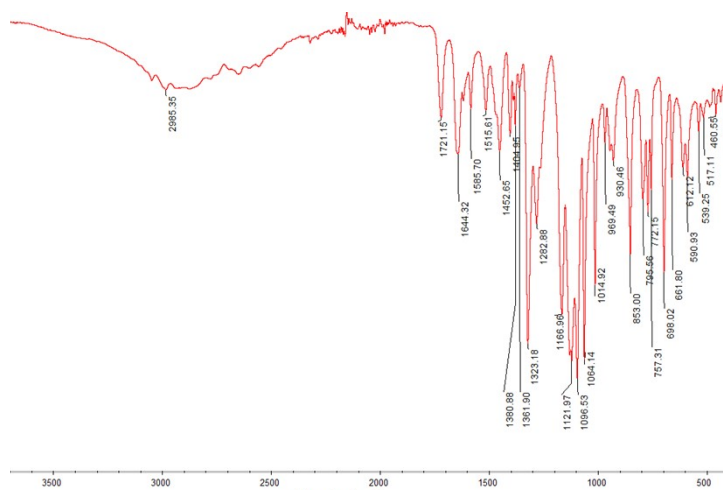

(B)

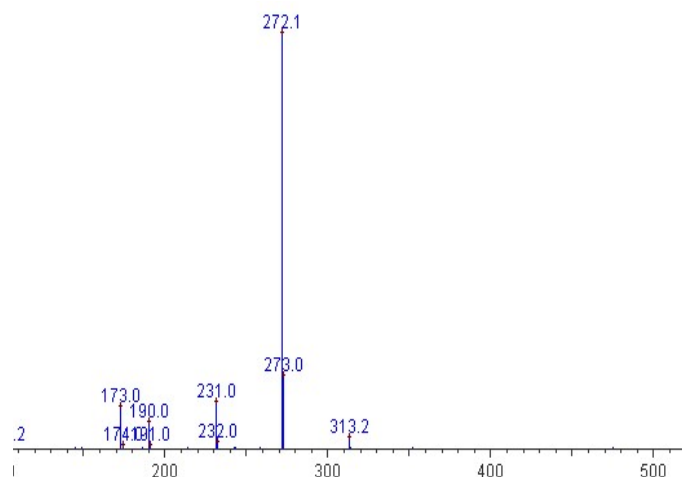

**Figure S7.** A) FTIR spectrum of compound **3**. Assignments ( $\text{cm}^{-1}$ ): 2985  $\rightarrow$  str. C-H ( $\text{CH}_3$ ); 1644  $\rightarrow$  str. C=N (ring); 1452  $\rightarrow$  oxazole ring vibr.; 1405  $\rightarrow$  sym. bend.  $\text{CH}_3\text{-C-CH}_3$ ; 1282  $\rightarrow$   $\text{CF}_3\text{Ph-C(=N)(-O)}$  vibr.; 1167  $\rightarrow$  str. C- $\text{CH}_3$ ; 1122  $\rightarrow$  str. -C-O-; 1096  $\rightarrow$  ip vibration C-H from benzene; 1014  $\rightarrow$  sym str. =C-O-; 969  $\rightarrow$  C-H oop vibr. ( $\text{CH}_3$ ); 853  $\rightarrow$  oop vibration benzene ring (H-C-C-H in 1,4-disubstituted benzenes); 795  $\rightarrow$  rocking  $\text{CH}_3\text{-C-CH}_3$ ; 772  $\rightarrow$  C-F; 757  $\rightarrow$  - $\text{CF}_3$ ; 698  $\rightarrow$  oop vibration benzene ring; 662  $\rightarrow$  wagging  $\text{CH}_3\text{-C-C-CH}_3$ ; 591  $\rightarrow$  C-C skeleton vibr.; 539  $\rightarrow$  ip vibration benzene ring; 517  $\rightarrow$  C-C skeleton vibr.; B) ESI-MS (+) Mass spectrum of compound **3** (base peak:  $m/z$  272)



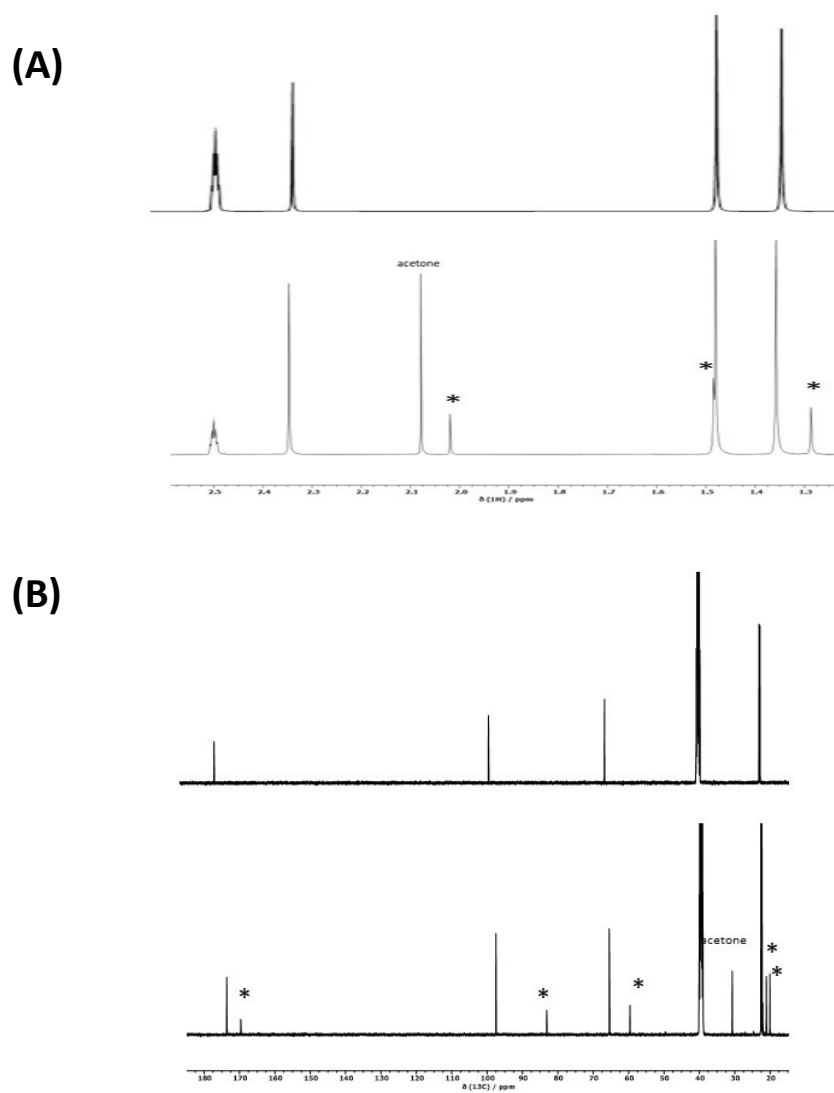

**Figure S8.** Decomposition experiment for compound **1** followed via  $^1\text{H}$  NMR (A) and  $^{13}\text{C}$  NMR (B) spectra in  $\text{DMSO-}d_6$ . For each analysis, the top spectra represent the initial situation, the bottom spectra are related to the compound after three days in water at room temperature. The peaks highlighted with \* indicate the decomposed product.

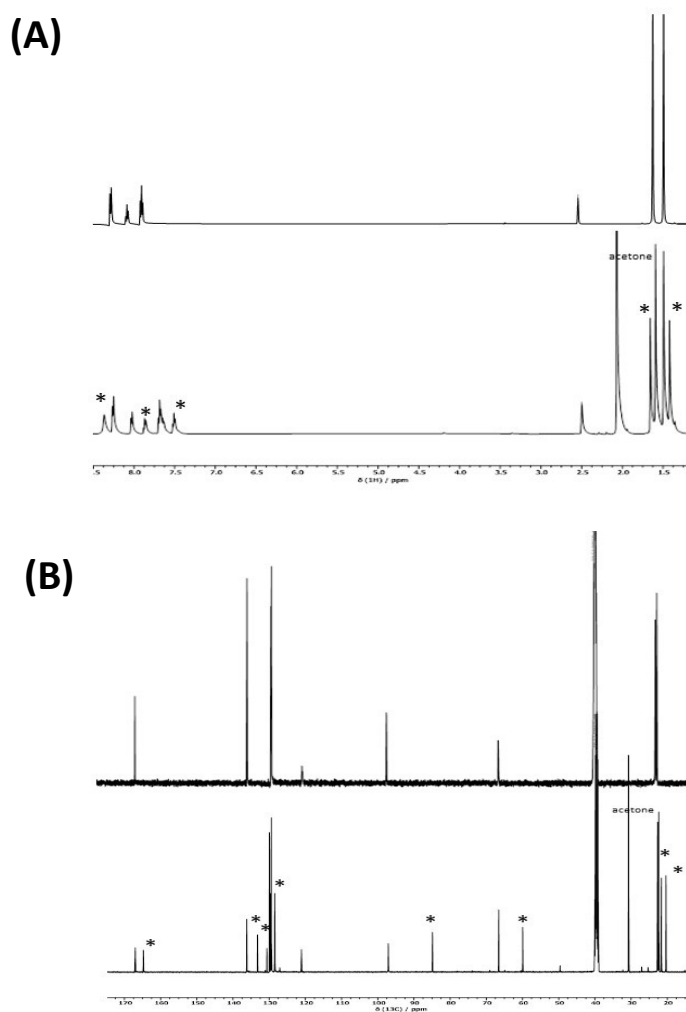

**Figure S9.** Decomposition experiment for compound **2** followed via  $^1\text{H}$  NMR (A) and  $^{13}\text{C}$  NMR (B) spectra in  $\text{DMSO-}d_6$ . For each analysis, the top spectra represent the initial situation, the bottom spectra are related to the compound after three days in water at room temperature. The peaks highlighted with \* indicate the decomposed product.

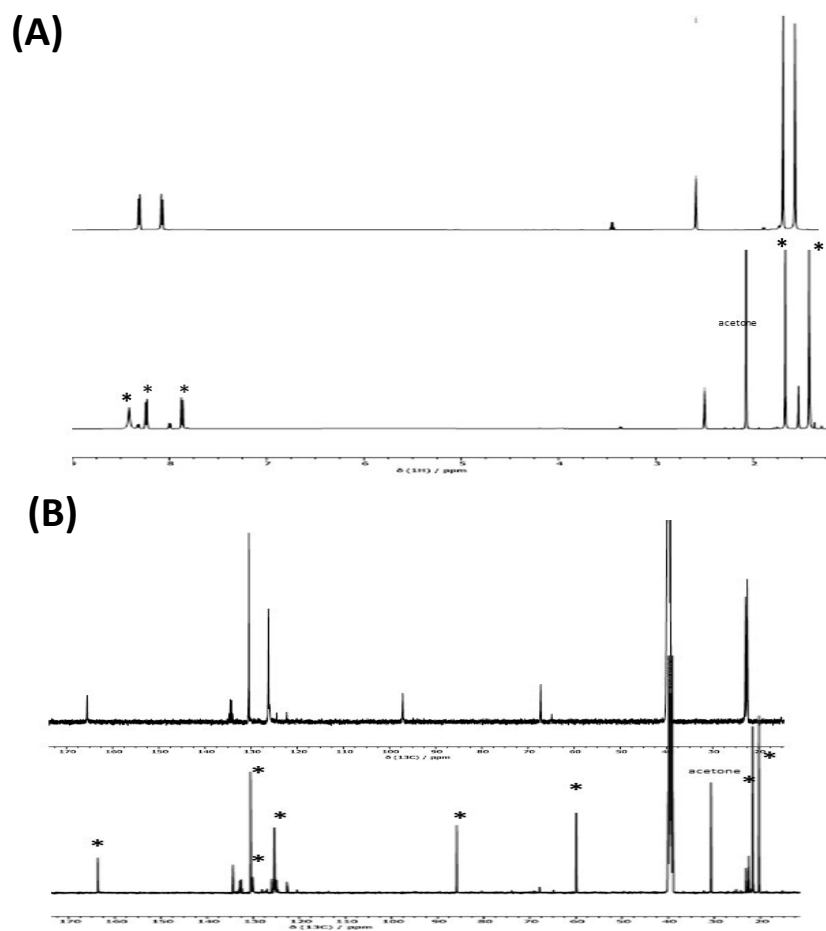

**Figure S10.** Decomposition experiment for compound **3** followed via  $^1\text{H}$  NMR (A) and  $^{13}\text{C}$  NMR (B) spectra in  $\text{DMSO-}d_6$ . For each analysis, the top spectra represent the initial situation, the bottom spectra are related to the compound after three days in water at room temperature. The peaks highlighted with \* indicate the decomposed product.

(A)

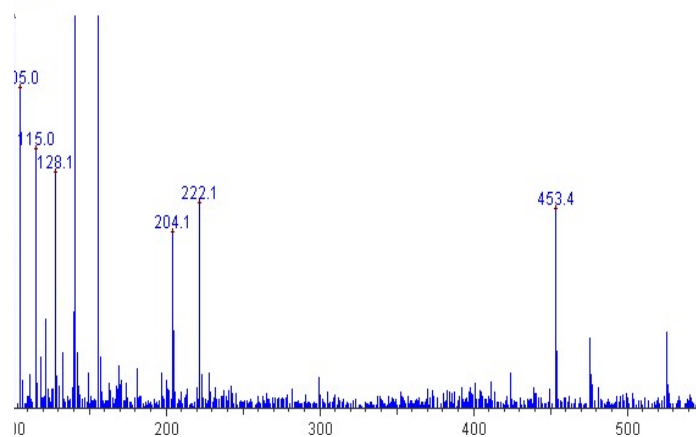

(B)

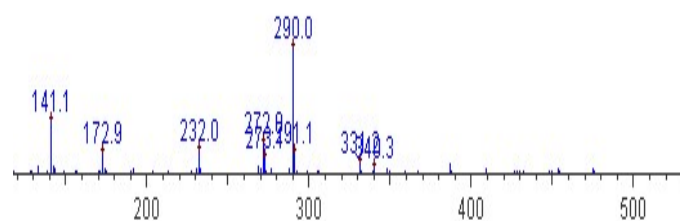

**Figure S11.** ESI-MS spectrum (+) of A) compound **2**, and B) compound **3** after decomposition.

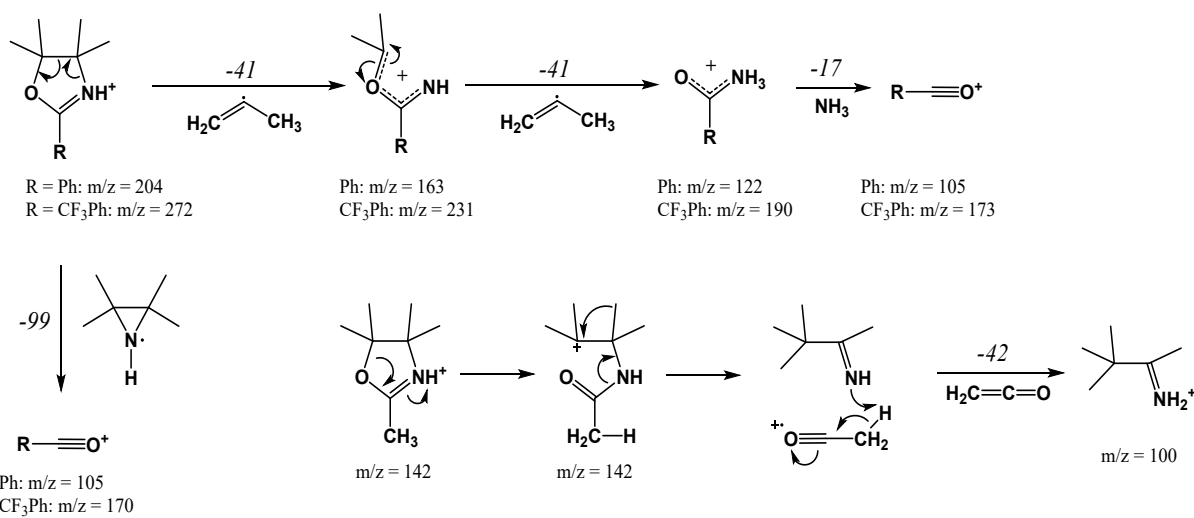

**Figure S12.** Proposed fragmentation pattern for compounds **1-3** with the mass peaks assigned in the ESI-MS spectra reported in Figures **S2**, **S4** and **S7** (Ref.: S. Osman, C.J. Dooley, T.A. Foglia, and L.M. Gregory, *Org. Mass. Spectrom.* **1970**, *4*, 139-145).

**Table S1.** Selected distances [Å] of compounds **1**, **2** and **3**.

|         | <b>1</b>   | <b>2</b>   | <b>3</b>   |
|---------|------------|------------|------------|
| Te1–Cl1 | 2.5431(4)  | 2.4557(4)  | 2.5271(3)  |
| Te1–Cl2 | 2.5380(4)  | 2.5341(4)  | 2.5464(3)  |
| Te1–Cl3 | 2.5494(4)  | 2.6432(4)  | 2.5385(3)  |
| O1–C2   | 1.5111(17) | 1.5063(15) | 1.5035(13) |
| O1–C5   | 1.3191(17) | 1.3138(16) | 1.3120(14) |
| C2–C3   | 1.5577(19) | 1.5548(18) | 1.5609(16) |
| C2–C6   | 1.512(2)   | 1.5125(19) | 1.5098(17) |
| C2–C7   | 1.519(2)   | 1.5184(18) | 1.5146(17) |
| C3–N4   | 1.4817(17) | 1.4938(16) | 1.4841(14) |
| C3–C8   | 1.531(2)   | 1.5287(18) | 1.5294(16) |
| C3–C9   | 1.520(2)   | 1.5189(17) | 1.5248(16) |
| N4–C5   | 1.2887(19) | 1.2953(17) | 1.2946(15) |
| C5–C10  | 1.477(2)   | 1.4636(18) | 1.4596(15) |
| C10–C11 |            | 1.4001(18) | 1.3967(16) |
| C10–C15 |            | 1.3920(19) | 1.3998(16) |
| C11–C12 |            | 1.3853(19) | 1.3886(17) |
| C12–C13 |            | 1.3931(19) | 1.3883(19) |
| C13–C14 |            | 1.3884(19) | 1.3897(18) |
| C14–C15 |            | 1.3915(19) | 1.3896(16) |
| C13–C16 |            | 1.5013(18) |            |
| C16–F17 |            | 1.3304(16) |            |
| C16–F18 |            | 1.3382(16) |            |
| C16–F19 |            | 1.3380(16) |            |

**Table S2.** Selected angles [°] of compounds **1**, **2** and **3**.

|             | <b>1</b>   | <b>2</b>   | <b>3</b>   |
|-------------|------------|------------|------------|
| C5–O1–C2    | 107.36(10) | 107.31(10) | 107.67(9)  |
| O1–C2–C3    | 101.41(10) | 101.38(9)  | 101.46(9)  |
| O1–C2–C6    | 107.73(11) | 107.46(10) | 106.98(10) |
| O1–C2–C7    | 104.63(11) | 104.96(10) | 104.98(9)  |
| C6–C2–C3    | 115.25(12) | 115.86(11) | 116.09(10) |
| C6–C2–C7    | 111.61(12) | 111.80(11) | 111.91(11) |
| C7–C2–C3    | 114.82(12) | 113.98(11) | 113.94(10) |
| N4–C3–C2    | 99.64(11)  | 98.66(9)   | 99.61(9)   |
| C9–C3–C2    | 114.01(12) | 113.89(11) | 114.25(10) |
| C8–C3–C2    | 114.06(12) | 114.14(11) | 113.42(10) |
| N4–C3–C9    | 110.06(12) | 111.41(10) | 111.06(10) |
| N4–C3–C8    | 107.37(11) | 106.59(10) | 107.37(10) |
| C9–C3–C8    | 110.89(12) | 111.25(11) | 110.47(10) |
| C5–N4–C3    | 111.31(12) | 110.72(11) | 110.79(10) |
| N4–C5–O1    | 114.03(13) | 113.77(12) | 114.25(10) |
| N4–C5–C10   | 127.05(13) | 127.71(12) | 127.07(10) |
| O1–C5–C10   | 118.92(13) | 118.52(11) | 118.66(10) |
| C15–C10–C11 |            | 121.03(12) | 120.79(11) |
| C15–C10–C5  |            | 120.57(12) | 120.11(10) |
| C11–C10–C5  |            | 118.40(12) | 119.09(10) |
| C12–C11–C10 |            | 119.61(12) | 119.21(11) |
| C11–C12–C13 |            | 119.15(12) | 120.16(11) |
| C14–C13–C12 |            | 121.44(12) | 120.61(11) |
| C13–C14–C15 |            | 119.58(13) | 119.98(11) |
| C14–C15–C10 |            | 119.18(12) | 119.24(11) |
| C14–C13–C16 |            | 120.22(12) |            |
| C12–C13–C16 |            | 118.33(12) |            |
